# Supplementary material for: Ammonia promoted barium sulfate catalyst for dehydration of lactic acid to acrylic acid
Source: Royal Society of Chemistry journal article supplement (doi:10.1039/c7ra10736f), 2017-01-01
Supplement: c7ra10736f1.pdf [file c7ra10736f1.pdf]

## Support Information

### Ammonia promoted barium sulfate catalyst for dehydration of lactic acid to acrylic acid

Xinli Li<sup>a</sup>, Zhi Chen<sup>a</sup>, Ping Cao<sup>a</sup>, Wenjie Pu<sup>b</sup>, Weixin Zou<sup>c</sup>, Congming Tang<sup>a\*</sup> and Lin Dong<sup>c</sup>

<sup>a</sup>School of Chemistry and Chemical Engineering, Chongqing University of Technology, Chongqing 40054, PR China; <sup>b</sup>Chemical Synthesis and Pollution Control Key Laboratory of Sichuan Province, China West Normal University, Nanchong, Sichuan, 637002, PR China; <sup>c</sup>Jiangsu Key Laboratory of Vehicle Emissions Control, Center of Modern Analysis, Nanjing University, Nanjing 210093, PR China)

A: treated without alkaline agents

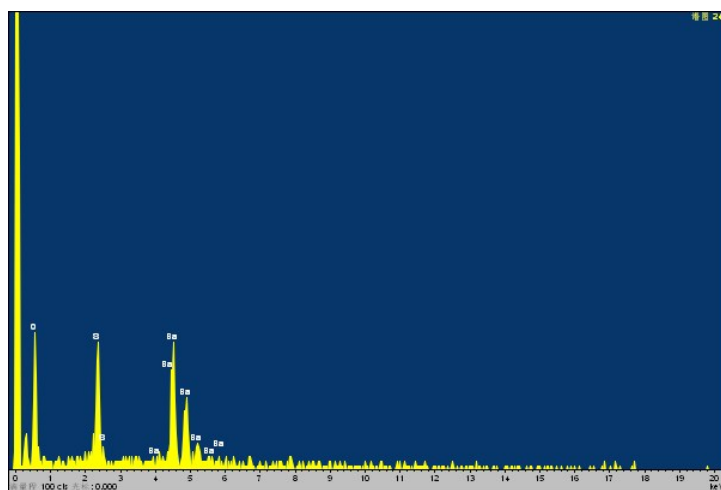

B: treated with aqueous ammonia

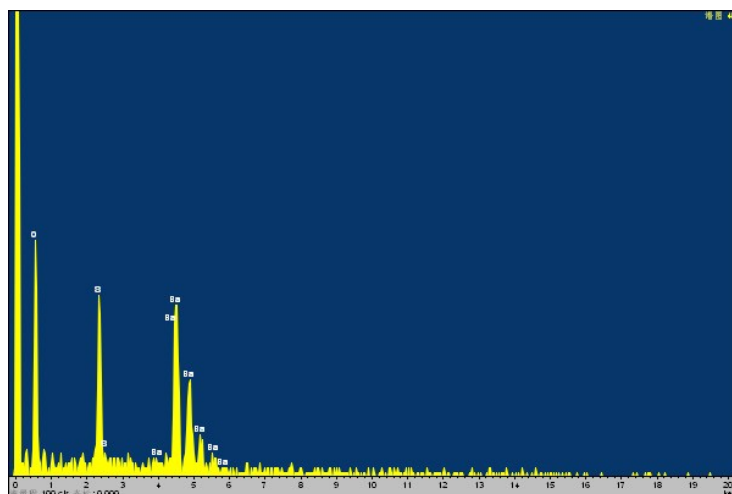

C: treated with ethylenediamine

\* Corresponding author. Tel.: +86 23 62563250.

E-mail address: tcmtang2001@163.com (C. M. Tang).

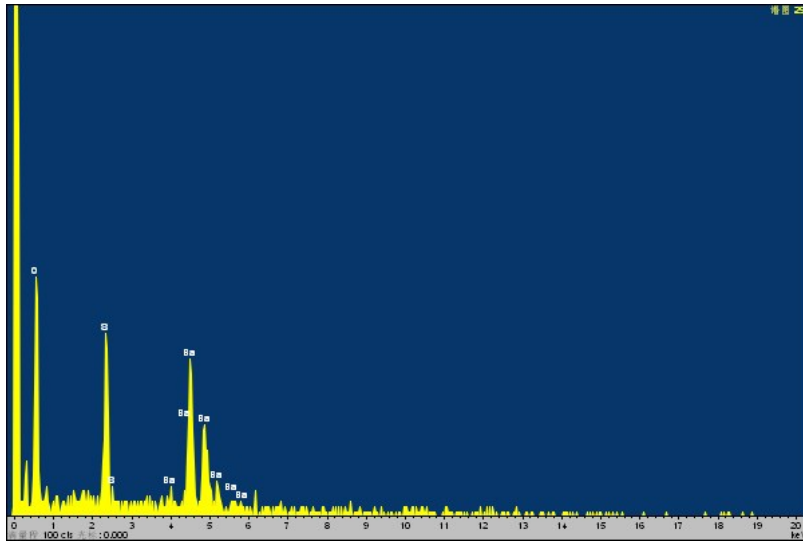

D: treated with n-butylamine

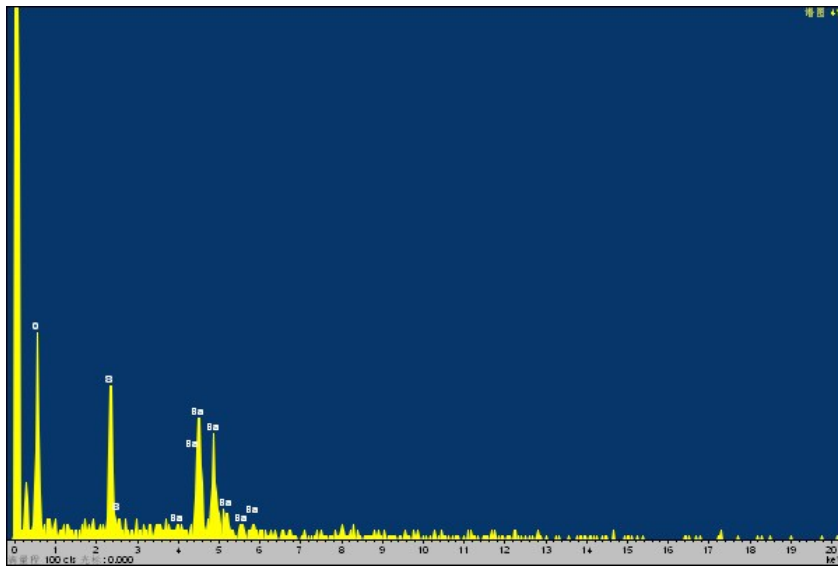

Fig. S1 EDS profiles of the modified BaSO<sub>4</sub> with different alkaline reagents.

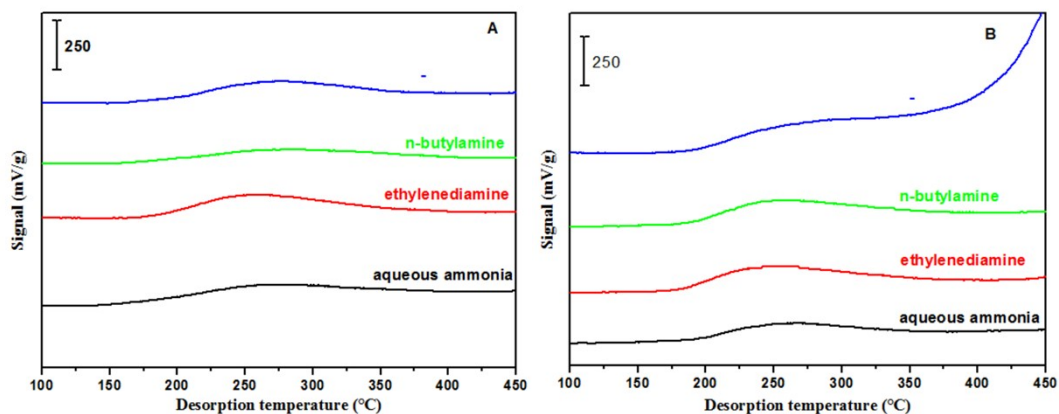

**Fig. S2**  $\text{NH}_3$ -TPD profiles of the modified  $\text{BaSO}_4$  with different alkaline reagents and their corresponding  $\text{CO}_2$ -TPD profiles.

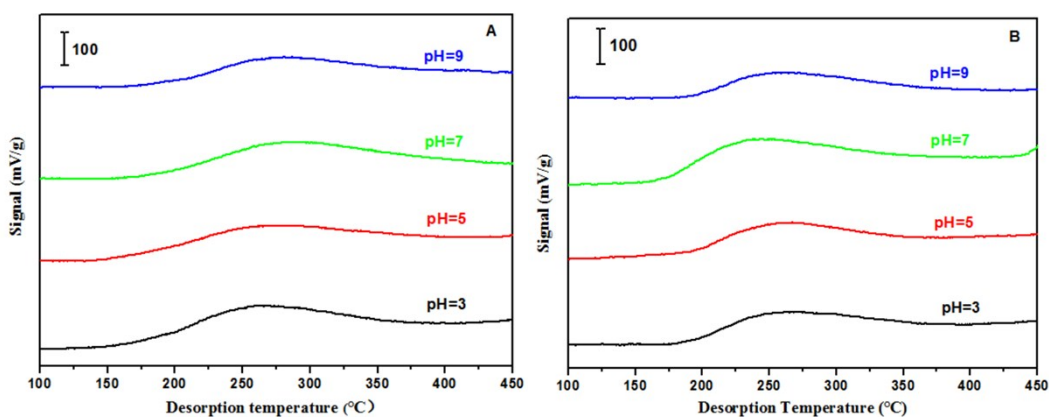

**Fig. S3**  $\text{NH}_3$ -TPD profiles of the modified  $\text{BaSO}_4$  with aqueous ammonia at different pH values and their corresponding  $\text{CO}_2$ -TPD profiles.

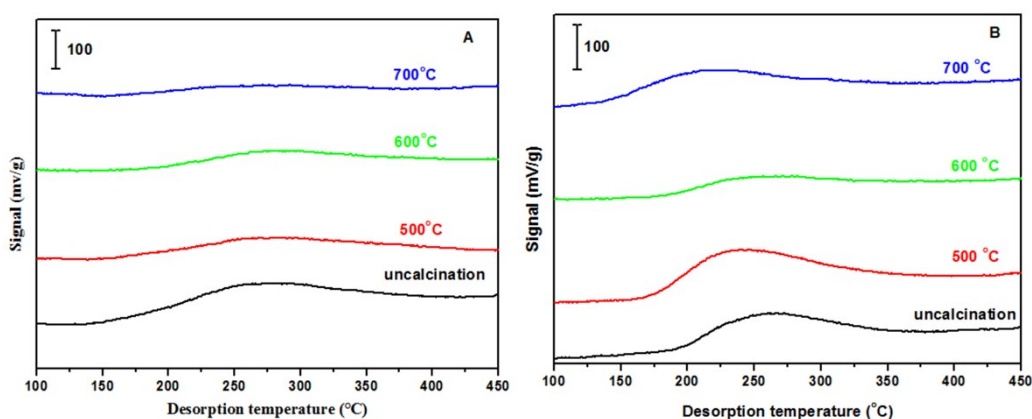

**Fig. S4**  $\text{NH}_3$ -TPD profiles of the modified  $\text{BaSO}_4$  with aqueous ammonia and pH=5 at different calcination temperatures and their corresponding  $\text{CO}_2$ -TPD profiles.

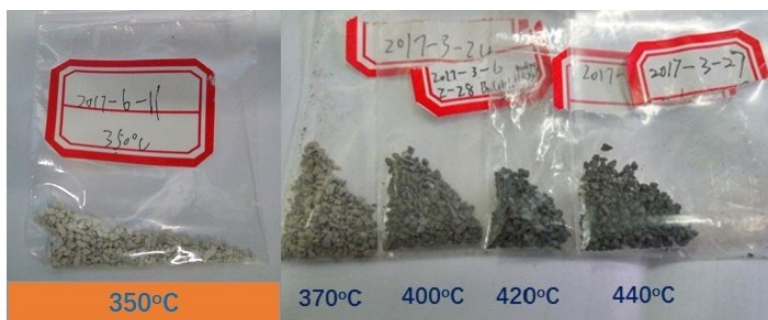

**Fig. S5** The photos of the used catalyst with different reaction temperatures.

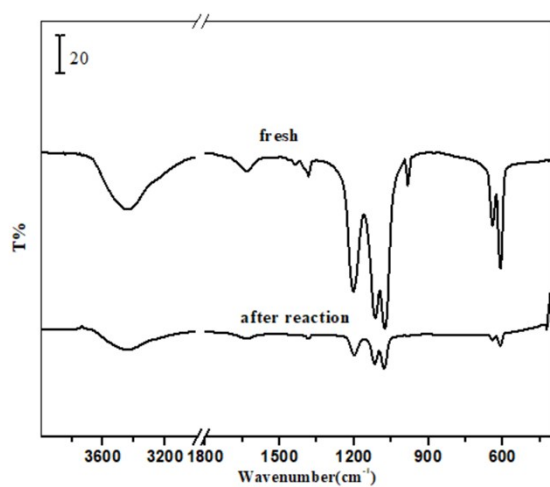

**Fig. S6** Comparison of BaSO<sub>4</sub> catalyst FT-IR spectra before and after reaction

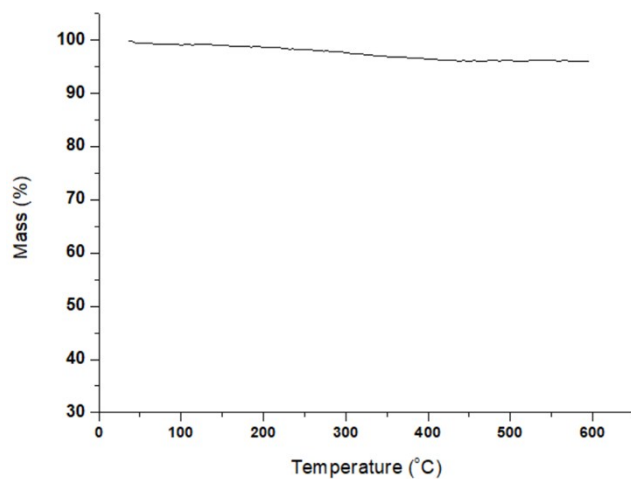

**Fig. S7** TG profile of the spent catalyst

---

**Table S1** EDS elemental analysis for the modified BaSO<sub>4</sub> with different alkaline reagents

---

| Alkaline reagents | Elemental composition (atom%) |       |       |
|-------------------|-------------------------------|-------|-------|
|                   | Ba                            | S     | O     |
| -                 | 8.64                          | 11.57 | 79.79 |
| Aqueous ammonia   | 7.9                           | 9.86  | 82.24 |
| Ethylenediamine   | 6.07                          | 10.19 | 83.73 |
| n-Butylamine      | 7.02                          | 11.3  | 81.69 |

---
